# Supplementary material for: Dengue prediction by the web: Tweets are a useful tool for estimating and forecasting Dengue at country and city level
Source: PLoS Negl Trop Dis. 2017 Jul 18;11(7):e0005729. doi: 10.1371/journal.pntd.0005729 (PMC5533462; doi:10.1371/journal.pntd.0005729)
Supplement: S1 Table — (XLSX) [file pntd.0005729.s003.xlsx]

## Sheet: TablePaperSup1
																		Dengue Cases							Dengue Tweets
City	Municipality	State	Region	Population (2010)	GDP per capita BRL (2013)	IDHM (2010)	IDHM Income (2010)	IDHM Longevity (2010)	IDHM Education (2010)	Houses with computer (%)	Houses with internet (%)	Climate Class (Köppen)	Altitude (m)	Temp (oC)	Rain (mm)	Latitute	Longitude	2012	2013	2014	2015	2016	Total	Incidence (total)	2012	2013	2014	2015	2016	Total	Incidence (total)	r correlation (Den~Tw)	Weeks with Tw (%)	Weeks with dengue (%)	Deviance Explained (model estimate)	Mean relative error (model estimate)
Alfenas (MG)	Alfenas	MG	Southeast	73774	22470	0.761	0.737	0.841	0.712	50.34	41.49	Cwb	817.42	19.33	135.75	-21.4259	-45.949	35	385	498	2975	4047	7940	10762.6	3	10	49	122	94	278	376.827	0.708341	40.2715	85.5204	82.3	1.22735
Alvorada (RS)	Alvorada	RS	South	195673	9765.91	0.699	0.694	0.874	0.564	44.3	29.37	Cfa	31.7614	18.6753	132.395	-29.9916	-51.0639	7	64	1	15	99	99	50.5946	2	25	15	55	52	149	76.1475	0.0181083	9.50226	11.7647
Americana (SP)	Americana	SP	Southeast	210638	44046.6	0.811	0.8	0.876	0.76	67.07	60.05	Cfa	573.22	20.19	107.76	-22.7389	-47.3338	72	1507	9428	7881	1094	19982	9486.42	20	111	296	206	82	715	339.445	0.599908	67.4208	93.2127	89.3	0.905285
Amparo (SP)	Amparo	SP	Southeast	65829	45868.3	0.785	0.78	0.871	0.711	55.95	44.18	Cfb	796.6	18.91	117.79	-22.708	-46.7739	20	120	714	7155	48	8057	12239.3	1	8	14	67	8	98	148.871	0.846488	19.457	76.4706
Ananindeua (PA)	Ananindeua	PA	North	471980	11091.2	0.718	0.684	0.821	0.658	33.12	23.98	Af	15.77	27.91	248.61	-1.36446	-48.3765	103	500	216	508	275	1602	339.421	6	23	20	59	46	154	32.6285	0.274842	37.5566	92.7602
Anapolis (GO)	Anapolis	GO	Midwest	334613	33691.6	0.737	0.737	0.822	0.66	44.85	36.55	Aw	1015.1	21.09	135.3	-16.3284	-48.9543	736	8693	7827	11230	10718	39204	11716.2	23	120	62	123	210	538	160.783	0.649097	73.7557	100	84.4	0.461505
Angra dos Reis (RJ)	Angra dos Reis	RJ	Southeast	169511	33699.6	0.724	0.74	0.846	0.605	46.33	36.49	Cfa	394.64	20.52	146.29	-23.0057	-44.3261	104	8232	437	8561	1071	18405	10857.7	12	147	47	249	134	589	347.47	0.71405	62.8959	91.8552	79.7	1.48165
Aparecida de Goiania (GO)	Aparecida de Goiania	GO	Midwest	455657	19774	0.718	0.716	0.834	0.62	38.98	27.07	Aw	796.47	22.06	135.76	-16.8184	-49.2471	2157	14713	10857	16820	11708	56255	12345.9	5	22	27	84	14	152	33.3584	0.31614	33.0317	99.095	69.4	1.5567
Apucarana (PR)	Apucarana	PR	South	120919	19555.7	0.748	0.741	0.845	0.668	49.97	38.92	Cfa	682.42	19.73	128.97	-23.5515	-51.466	52	290	214	742	127	1425	1178.47	4	36	25	51	22	138	114.126	0.396589	33.9367	87.7828
Aracaju (SE)	Aracaju	SE	Northeast	571149	22646.7	0.77	0.784	0.823	0.708	51.99	44.17	Am	7.91	25.95	125.3	-10.9488	-37.0739	617	1030	1790	4268	728	8433	1476.5	72	190	150	295	212	919	160.904	0.296314	81.9005	98.6425	48.9	0.873989
Araçatuba (SP)	Araçatuba	SP	Southeast	181579	29448.5	0.788	0.782	0.841	0.744	55.82	46.27	Aw	380.05	22.45	102.4	-21.2036	-50.4567	197	2353	5434	2833	779	11596	6386.2	24	116	186	197	108	631	347.507	0.508615	69.6833	97.7376	83.8	0.870546
Araguari (MG)	Araguari	MG	Southeast	109801	24881.1	0.663	0.633	0.821	0.56	44.77	34.34	As	533.54	22.09	73.96	-18.6461	-48.1925	10	324	209	1429	1426	3398	3094.69	6	21	25	24	15	91	82.8772	0.183775	23.0769	75.5656
Araraquara (SP)	Araraquara	SP	Southeast	208662	33394.4	0.815	0.788	0.877	0.782	63.39	53.48	Cwa	639.62	20.48	115.27	-21.7852	-48.1786	231	1709	2438	1910	1828	8116	3889.54	21	71	44	228	76	440	210.867	0.211426	54.7511	98.19	63.5	1.23514
Araras (SP)	Araras	SP	Southeast	118843	33567.6	0.781	0.763	0.859	0.728	59.9	50.86	Cwa	654.3	19.97	113.76	-22.36	-47.3807	51	1983	366	3935	406	6741	5672.19	12	102	13	109	26	262	220.459	0.756132	41.629	89.1403	84.8	0.974913
Araruama (RJ)	Araruama	RJ	Southeast	112008	17385.3	0.718	0.714	0.839	0.617	39.4	28.42	Aw	28.17	22.33	88.92	-22.8645	-42.3337	14	2594	34	413	937	3992	3564.03	5	126	24	100	102	357	318.727	0.697991	45.2489	65.1584	69.9	1.61145
Araxa (MG)	Araxa	MG	Southeast	93672	42414.6	0.772	0.756	0.858	0.709	54.97	43.82	Cwb	1033.74	19.24	138.03	-19.5909	-46.9445	16	1033	268	2630	3938	7885	8417.67	1	13	6	66	85	171	182.552	0.801567	28.9593	89.1403	80.8	1.17386
Aruja (SP)	Aruja	SP	Southeast	74905	35345	0.784	0.761	0.866	0.73	50.45	40.24	Cfb	771.98	18.55	116.93	-23.3972	-46.3201	5	56	343	2144	191	2739	3656.63	7	21	21	51	13	113	150.858	0.671198	29.8643	69.2308
Assis (SP)	Assis	SP	Southeast	95144	24906.2	0.805	0.771	0.865	0.781	57.18	47.96	Cfa	534.54	20.89	116.06	-22.6601	-50.4196	31	1635	1520	5030	126	8342	8767.76	3	39	22	71	25	160	168.166	0.535633	32.5792	84.6154
Atibaia (SP)	Atibaia	SP	Southeast	126603	34934.4	0.765	0.786	0.851	0.67	53.49	43.6	Cfb	844.97	18.36	119.01	-23.1178	-46.5576	8	177	1622	1446	113	3366	2658.7	15	33	83	77	41	249	196.678	0.685405	46.1538	76.0181	78	1.1973
Balneario Camboriu (SC)	Balneario Camboriu	SC	South	108089	32105.8	0.845	0.854	0.894	0.789	70.1	59.65	Cfa	53.68	20.5	137.32	-26.993	-48.6372	1	26	15	574	65	681	630.036	10	60	26	118	101	315	291.427	0.381462	52.4887	48.4163	74.4	0.652497
Barbacena (MG)	Barbacena	MG	Southeast	126284	15529.4	0.769	0.751	0.881	0.687	49.57	37.94	Cwb	1099.9	17.28	127.97	-21.2223	-43.7708	0	64	23	71	1767	1925	1524.34	7	65	11	18	42	143	113.237	0.141248	27.1493	47.9638
Barra do Pirai (RJ)	Barra do Pirai	RJ	Southeast	94778	17709	0.733	0.723	0.819	0.665	48.71	37.53	Cwa	506.73	20.07	116.81	-22.472	-43.8282	30	1570	185	1952	1186	4923	5194.24	2	94	20	43	37	196	206.799	0.570677	33.0317	76.9231	66.3	2.47313
Barra Mansa (RJ)	Barra Mansa	RJ	Southeast	177813	28004.9	0.729	0.72	0.819	0.657	51.3	39.1	Cwa	507.96	20.08	121.69	-22.5415	-44.1788	8	2205	163	1264	443	4083	2296.23	4	197	22	79	70	372	209.209	0.744134	47.5113	70.5882	69.7	1.47172
Barretos (SP)	Barretos	SP	Southeast	112101	28418.7	0.789	0.762	0.875	0.738	52.49	43.85	Aw	523.97	21.8	114.61	-20.5535	-48.5717	329	4653	288	2494	1311	9075	8095.38	28	167	19	36	26	276	246.207	0.781536	36.1991	90.9502	62.9	3.53773
Barueri (SP)	Barueri	SP	Southeast	240749	171831	0.786	0.791	0.866	0.708	58.84	49.74	Cfb	780.34	18.55	119.86	-23.5101	-46.8739	61	680	3050	7432	52	11275	4683.3	8	79	132	322	71	612	254.207	0.752057	62.8959	87.3303	77.2	1.8803
Bauru (SP)	Bauru	SP	Southeast	343937	28976.2	0.801	0.8	0.854	0.752	61.56	52.75	Cfa	532.11	20.93	115.75	-22.3145	-49.061	64	9399	1055	10399	1366	22283	6478.8	21	410	100	385	168	1084	315.174	0.81289	75.1131	96.3801	85.1	1.34572
Bayeux (PB)	Bayeux	PB	Northeast	99716	9871.94	0.649	0.619	0.779	0.566	23.35	16.35	As	37.31	25.85	140.68	-7.13169	-34.9324	42	180	202	487		911	913.595	0	47	3	4		54	54.1538	-0.04	8.59729	69.6833
Belem (PA)	Belem	PA	North	1393399	18074.1	0.746	0.751	0.822	0.673	42.52	34.26	Am	8.21	27.93	250.65	-1.45665	-48.4907	444	1527	1370	3134	762	7237	519.377	156	730	376	853	824	2939	210.923	0.391677	95.4751	99.095	53.1	0.840621
Belo Horizonte (MG)	Belo Horizonte	MG	Southeast	2375151	32844.4	0.81	0.841	0.856	0.737	67.17	59.39	Cwb	909.06	19.1	128.86	-19.9174	-43.9434	1025	131338	12709	31413	156818	333303	14032.9	341	7710	1268	3122	6430	18871	794.518	0.926443	90.0452	100	90.3	0.809179
Bertioga (SP)	Bertioga	SP	Southeast	47645	28303	0.73	0.727	0.817	0.654	43.61	34.94	Af	249.04	21.16	238.92	-23.8079	-46.062	27	1364	2032	2879	798	7100	14901.9	4	64	49	45	39	201	421.87	0.555981	38.009	80.9955	72.4	1.45024
Betim (MG)	Betim	MG	Southeast	378089	55338.5	0.749	0.709	0.864	0.687	46.93	34.36	Cwb	819.76	19.64	127.02	-19.9653	-44.2067	215	25163	1983	26180	15819	69360	18344.9	14	401	43	180	145	783	207.094	0.775022	60.181	99.095	90.8	0.820614
Birigui (SP)	Birigui	SP	Southeast	108728	22301.3	0.78	0.743	0.869	0.734	49.54	38.71	Aw	408.05	22.21	102.36	-21.2914	-50.346	36	1130	6511	7731	4728	20136	18519.6	5	67	96	82	72	322	296.152	0.662323	48.8688	97.2851	73.6	2.40347
Blumenau (SC)	Blumenau	SC	South	309011	39179.5	0.806	0.812	0.894	0.722	66.7	55.21	Cfa	244.81	19.63	150.63	-26.9181	-49.0806	1	52	26	191	29	299	96.7603	13	101	59	194	143	510	165.043	0.382951	69.2308	49.3213	50.1	0.560152
Boa Vista (RR)	Boa Vista	RR	North	284313	21663.7	0.752	0.737	0.816	0.708	37.07	26.79	Am	87.63	25.42	150.7	2.81964	-60.6926	711	1163	1097	1601	143	4715	1658.38	59	113	110	105	64	451	158.628	0.175146	70.5882	97.7376	74	0.58988
Bragança Paulista (SP)	Bragança Paulista	SP	Southeast	146744	27471.5	0.776	0.772	0.861	0.704	55.27	45.29	Cfb	858.46	18.39	121.22	-22.9506	-46.547	13	150	614	1161	250	2188	1491.03	3	32	59	111	55	260	177.179	0.554553	47.9638	84.1629	73.6	1.02382
Brasilia (DF)	Brasilia	DF	Midwest	2570160	62859.4	0.824	0.863	0.873	0.742	66.48	58.69	Aw	1034.79	20.96	127.62	-15.7945	-47.8806	718	18137	17823	12133	17558	66369	2582.29	222	1869	1151	2017	2736	7995	311.07	0.706894	95.9276	100	87.8	0.561839
Brusque (SC)	Brusque	SC	South	105503	37650.1	0.795	0.794	0.894	0.707	62.74	50.58	Cfa	184.29	19.76	148.77	-27.1001	-48.9143	2	28	16	106	25	177	167.768	2	18	13	49	38	120	113.741	0.399171	32.1267	37.5566
Cabo de Santo Agostinho (PE)	Cabo de Santo Agostinho	PE	Northeast	185025	37530.1	0.686	0.654	0.812	0.609	28.86	23.01	As	82.25	25.45	143.84	-8.27725	-35.0285	120	816	1198	3629	1998	7761	4194.57	0	7	16	66	35	124	67.018	0.703383	25.3394	95.0226
Cabo Frio (RJ)	Cabo Frio	RJ	Southeast	186227	84225.7	0.735	0.743	0.836	0.64	47.8	37.76	Aw	11.45	22.4	85.31	-22.8869	-42.0275	481	7507	250	187	248	8673	4657.22	38	780	97	177	198	1290	692.703	0.878688	77.8281	71.0407	82.3	1.32053
Caçapava (SP)	Caçapava	SP	Southeast	84752	37850.7	0.788	0.754	0.858	0.755	56.24	48.01	Cfa	634.38	19.35	119.49	-23.1004	-45.7099	17	163	420	1359	50	2009	2370.45	3	22	42	78	61	206	243.062	0.623217	39.3665	66.0633	74.3	1.01843
Cachoeirinha (RS)	Cachoeirinha	RS	South	118278	45379.6	0.757	0.749	0.857	0.675	57.01	44.85	Cfa	29.34	18.75	134.44	-29.9472	-51.104	0	18	7	12	9	46	38.8914	4	30	19	48	29	130	109.911	0.208346	28.0543	15.3846	21.2	0.26231
Cachoeiro de Itapemirim (ES)	Cachoeiro de Itapemirim	ES	Southeast	189889	20580.3	0.746	0.733	0.837	0.677	47.83	40.78	Aw	191.94	22.19	96.84	-20.846	-41.1211	185	8381	2664	5266	8854	25350	13349.9	7	77	11	23	30	148	77.9403	0.651109	29.8643	99.095	51.6	3.05969
Cajazeiras (PB)	Cajazeiras	PB	Northeast	58446	12688.3	0.679	0.668	0.815	0.574	25.95	21.42	As	341.41	24.89	74.88	-6.88992	-38.5611	11	688	141	958	1350	3148	5386.17	1	36	1	10	5	53	90.682	0.243342	12.2172	73.7557
Campina Grande (PB)	Campina Grande	PB	Northeast	385213	16347.2	0.72	0.702	0.812	0.654	42.66	35.74	As	477.74	23.29	54.23	-7.22036	-35.8738	13	1803	405	727	321	3269	848.621	16	159	63	137	114	489	126.943	0.16747	72.3982	85.5204	36.9	2.49134
Campinas (SP)	Campinas	SP	Southeast	1080113	44850.6	0.805	0.829	0.86	0.731	66.95	58.15	Cfa	669.51	19.54	112.92	-22.9109	-47.0735	983	12178	45907	70452	4108	133628	12371.7	78	453	1354	1695	480	4060	375.887	0.83972	89.1403	100	92.2	0.534966
Campo Grande (MS)	Campo Grande	MS	Midwest	786797	24839.2	0.784	0.79	0.844	0.724	50.34	41.93	Am	467.67	22.32	134.01	-20.4643	-54.6464	3810	44816	4221	9587	16935	79369	10087.6	123	1684	264	603	671	3345	425.141	0.866762	92.3077	99.5475	87.7	4.86157
Campo Maior (PI)	Campo Maior	PI	Northeast	45177	8056.35	0.656	0.629	0.793	0.566	15.25	12.04	As	147.29	26.86	115.58	-4.82198	-42.1651	9	135	26	44		214	473.692	0	20	2	2		24	53.1244	0.237535	4.52489	31.6742
Campo Mourao (PR)	Campo Mourao	PR	South	87194	27605	0.757	0.749	0.841	0.689	52.42	41.89	Cfa	615.81	19.84	133.67	-24.0431	-52.3778	30	6690	386	624	118	7848	9000.62	4	253	23	26	44	350	401.404	0.872659	39.819	79.1855	77.3	1.49006
Campos dos Goytacazes (RJ)	Campos dos Goytacazes	RJ	Southeast	463731	122063	0.716	0.715	0.83	0.619	37.6	29.6	Aw	74.69	22.42	93.79	-21.762	-41.3221	1259	24143	1569	4263	1243	32477	7003.41	21	265	46	103	74	509	109.762	0.783462	57.4661	93.6652	75.4	1.62456
Canoas (RS)	Canoas	RS	South	323827	33828.3	0.75	0.768	0.864	0.636	56.36	44.4	Cfa	14.13	18.84	133.29	-29.9139	-51.186	3	59	14	55	139	270	83.3779	22	129	43	87	105	386	119.199	0.328755	60.181	45.2489	60.2	0.528039
Caraguatatuba (SP)	Caraguatatuba	SP	Southeast	100840	22088.4	0.759	0.735	0.845	0.705	46.67	37.04	Cfa	351.26	20.57	163.12	-23.6261	-45.4238	265	3587	8508	9238	153	21751	21569.8	16	190	149	289	51	695	689.211	0.742359	60.6335	91.8552	69.7	1.92446
Carapicuiba (SP)	Carapicuiba	SP	Southeast	369584	11442.3	0.749	0.721	0.842	0.693	54.2	45.87	Cfb	780.11	18.52	120.79	-23.5236	-46.841	31	471	3791	3666	107	8066	2182.45	2	30	87	64	24	207	56.0089	0.689656	32.1267	88.2353	85.4	1.14545
Caratinga (MG)	Caratinga	MG	Southeast	85239	13221	0.706	0.697	0.836	0.603	35.3	27.26	Cwa	604.129	20.4796	106.794	-19.7876	-42.1417	117	810	0	38	1509	1509	1770.32	2	34	2	14	37	89	104.412	0.515719	5.88235	9.95475
Cariacica (ES)	Cariacica	ES	Southeast	348738	18371	0.718	0.699	0.844	0.628	47.95	39.33	Am	194.28	22.24	107.37	-20.2644	-40.4204	1384	10584	1502	3972	3260	20702	5936.26	22	159	68	130	89	468	134.198	0.59549	62.8959	99.5475	50.5	1.81448
Caruaru (PE)	Caruaru	PE	Northeast	314912	15529.3	0.677	0.681	0.799	0.569	32.1	26.67	BSh	538.64	22.79	47.15	-8.28682	-35.975	150	869	486	4899	1227	7631	2423.22	8	49	48	128	130	363	115.27	0.597415	52.4887	93.6652	60.2	1.97879
Cascavel (PR)	Cascavel	PR	South	286205	27496	0.782	0.776	0.846	0.728	56.14	44.18	Cfa	660.87	19.16	156.29	-24.9572	-53.4627	104	1233	755	1606	2160	5858	2046.78	19	148	73	110	124	474	165.616	0.553082	67.4208	100	69.8	1.04353
Cataguases (MG)	Cataguases	MG	Southeast	69757	17337.3	0.751	0.718	0.861	0.685	46.5	38.32	Aw	298.43	21.59	108.58	-21.3931	-42.6907	20	1520	113	597	2459	4709	6750.58	1	66	6	16	28	117	167.725	0.561862	22.1719	73.3032
Catanduva (SP)	Catanduva	SP	Southeast	112820	27409.8	0.785	0.767	0.853	0.74	55.59	45.21	Cwa	533.41	21.49	110.36	-21.1313	-48.9773	101	1303	840	11741	156	14141	12534.1	26	61	9	89	15	200	177.274	0.663431	37.5566	95.4751	79.9	1.63358
Caxias do Sul (RS)	Caxias do Sul	RS	South	435564	45883.1	0.782	0.812	0.86	0.686	61.07	47.42	Cfb	710.07	15.92	166.11	-29.1631	-51.1834	3	35	16	33	25	112	25.7138	28	117	59	103	92	399	91.6054	0.330188	63.3484	28.9593	31.8	0.426756
Chapeco (SC)	Chapeco	SC	South	183530	33411.4	0.79	0.779	0.871	0.727	53.55	40.11	Cfa	581.79	18.14	172.45	-27.1008	-52.617	2	111	56	372	824	1365	743.748	15	143	43	101	179	481	262.082	0.557253	64.7059	58.371	71.4	0.896962
Congonhas (MG)	Congonhas	MG	Southeast	48519	66534	0.753	0.732	0.877	0.665	52.51	40.4	Cwb	988.68	18.3124	132.723	-20.4908	-43.8617	10	212	3	47	1464	1464	3017.37	2	7	8	17	30	64	131.907	0.621305	4.52489	10.8597
Conselheiro Lafaiete (MG)	Conselheiro Lafaiete	MG	Southeast	116512	13864.3	0.761	0.736	0.86	0.697	53.31	41.64	Cwb	987.2	18.23	132	-20.6633	-43.786	11	121	29	126	982	1269	1089.16	7	67	16	37	31	158	135.608	0.158603	33.0317	49.3213
Contagem (MG)	Contagem	MG	Southeast	603442	37995.2	0.756	0.745	0.832	0.697	58.1	46.41	Cwb	902.83	19.17	127.53	-19.917	-44.0813	228	23289	2087	13373	41762	80739	13379.7	8	319	59	171	388	945	156.602	0.917923	63.3484	98.6425	89.7	1.28835
Cornelio Procopio (PR)	Cornelio Procopio	PR	South	46928	24403.9	0.759	0.746	0.848	0.692	54.2	41.81	Cfa	516.89	20.66	110.93	-23.1773	-50.6491	4	212	97	502	247	1062	2263.04	2	9	17	7	6	41	87.3679	0.0882099	12.2172	74.2081
Coronel Fabriciano (MG)	Coronel Fabriciano	MG	Southeast	103694	12869.8	0.755	0.715	0.865	0.696	49.28	39.72	Cwb	656.49	20.45	120.68	-19.5192	-42.6282	555	9081	312	728	5701	16377	15793.6	16	103	24	64	61	268	258.453	0.714967	48.8688	90.4977	78.9	1.73097
Corumba (MS)	Corumba	MS	Midwest	103703	25923.2	0.7	0.701	0.834	0.586	31.78	25.65	Aw	116	24.77	118.71	-19.0083	-57.6513	56	2121	967	745	254	4143	3995.06	1	39	11	20	9	80	77.1434	0.485593	23.5294	94.5701
Cotia (SP)	Cotia	SP	Southeast	201150	44735.7	0.78	0.789	0.851	0.707	55.21	43.7	Cfb	905.91	17.79	147.04	-23.6034	-46.9195	10	138	981	3630	237	4996	2483.72	3	35	43	116	8	205	101.914	0.700615	38.4615	72.3982	82.3	1.17485
Criciuma (SC)	Criciuma	SC	South	192308	27517	0.788	0.786	0.846	0.737	61.97	48.71	Cfa	50.64	19.39	119.33	-28.6717	-49.3778	5	31	6	37	14	93	48.3599	7	85	28	104	76	300	156	0.334665	53.8462	27.1493	31.1	0.37716
Cruzeiro (SP)	Cruzeiro	SP	Southeast	77039	23945.5	0.788	0.742	0.871	0.758	53.95	42.37	Cwa	766.27	18.77	130.63	-22.5733	-44.9699	61	6618	251	379	117	7426	9639.27	3	289	34	72	72	470	610.081	0.859525	47.0588	80.9955	85.8	1.11424
Cubatao (SP)	Cubatao	SP	Southeast	118720	61690.4	0.737	0.716	0.821	0.681	54.63	48.31	Af	112.93	21.9	228.62	-23.8923	-46.4268	179	5956	646	1106	264	8151	6865.73	13	233	54	150	32	482	405.997	0.83493	52.4887	90.4977	80.2	1.3021
Cuiaba (MT)	Cuiaba	MT	Midwest	551098	31016.2	0.785	0.8	0.834	0.726	53.45	45.9	Aw	280.32	25.25	118.28	-15.6012	-56.0988	354	3837	1554	3178	1481	10404	1887.87	46	191	104	238	177	756	137.181	0.397877	78.733	98.6425	40.5	1.11484
Curitiba (PR)	Curitiba	PR	South	1751907	42934.4	0.823	0.85	0.855	0.768	71.64	62.71	Cfb	914.7	17.09	129.64	-25.4288	-49.275	55	825	551	1241	568	3240	184.941	141	895	495	1219	2016	4766	272.046	0.539503	95.4751	95.4751	62.1	0.973468
Diadema (SP)	Diadema	SP	Southeast	386089	33015.7	0.757	0.717	0.844	0.716	56.84	48.78	Cfb	796.11	18.3	138.58	-23.6815	-46.6214	44	352	1475	6756	976	9603	2487.25	5	77	60	233	67	442	114.481	0.752015	60.6335	93.2127	84.2	1.17816
Divinopolis (MG)	Divinopolis	MG	Southeast	213016	21819.9	0.764	0.753	0.844	0.702	52.74	39.89	Cwa	783.62	19.93	128.61	-20.1454	-44.8962	39	6993	4686	2255	4929	18902	8873.51	27	581	222	151	187	1168	548.316	0.865048	74.6606	95.0226	82.9	1.53428
Dourados (MS)	Dourados	MS	Midwest	196035	26908.7	0.747	0.753	0.843	0.657	47.23	38.26	Am	378.16	22.14	133.87	-22.2237	-54.8149	44	2452	214	2596	3679	8985	4583.37	16	219	49	114	188	586	298.926	0.80336	63.8009	88.6878	66.9	2.51944
Duque de Caxias (RJ)	Duque de Caxias	RJ	Southeast	855048	28730.2	0.711	0.692	0.833	0.624	43.15	33.79	Af	138.89	21.95	150.53	-22.7821	-43.3071	289	7168	420	403	1500	9780	1143.8	15	138	70	216	156	595	69.5867	0.381873	68.3258	95.9276	78.3	1.20511
Embu (SP)	Embu	SP	Southeast	240230	31635.3	0.735	0.7	0.839	0.676	47.84	38.2	Cfb	819.4	18.25	128.27	-23.6511	-46.8527	30	380	776	2385	358	3929	1635.52	2	18	70	128	39	257	106.981	0.67159	44.3439	85.9729	87.8	0.734289
Escada (PE)	Escada	PE	Northeast	63517	10449	0.632	0.594	0.781	0.543	14.93	10.71	Am	144.63	25.08	133.2	-8.35688	-35.2241	10	87	27	721	385	1230	1936.49	0	0	0	20	1	21	33.062	0.324115	4.0724	57.4661
Esmeraldas (MG)	Esmeraldas	MG	Southeast	60271	7401.82	0.671	0.649	0.822	0.567	29.34	15.63	Cwa	814.4	19.8	122.8	-19.8072	-44.1821	13	1105	194	1287	3606	6205	10295.2	0	18	0	5	9	32	53.0935	0.321671	7.23982	66.0633
Feira de Santana (BA)	Feira de Santana	BA	Northeast	556642	17884.6	0.712	0.71	0.82	0.619	38.07	32.19	As	204.08	24.91	71.96	-12.2585	-38.9652	770	4826	1899	2681	256	10432	1874.1	10	89	56	84	61	300	53.8946	0.427775	52.4887	98.6425	71.9	0.806957
Fernandopolis (SP)	Fernandopolis	SP	Southeast	64696	22608.1	0.797	0.767	0.872	0.758	48.88	39.73	Aw	464.74	22.4	103.84	-20.2812	-50.2509	55	2078	355	1496	817	4801	7420.86	5	82	4	15	12	118	182.391	0.462801	21.267	95.4751
Florianopolis (SC)	Florianopolis	SC	South	421240	32385	0.847	0.87	0.873	0.8	75.47	67.67	Cfa	45.05	20.14	136.54	-27.5972	-48.5487	11	139	82	383	231	846	200.836	49	276	198	561	706	1790	424.936	0.635389	91.4027	82.3529	59.3	0.732721
Formiga (MG)	Formiga	MG	Southeast	65128	17341.6	0.755	0.729	0.874	0.676	51.02	41.11	Cwb	852.48	19.46	135.26	-20.4651	-45.4264	11	689	507	3370	139	4716	7241.13	2	55	7	28	8	100	153.544	0.214621	25.3394	83.7104
Fortaleza (CE)	Fortaleza	CE	Northeast	2452185	19494.4	0.754	0.749	0.824	0.695			As	25.34	26.96	116.88	-3.73243	-38.5302	1045	17089	10680	41767	23033	93614	3817.57	197	1062	571	1061	809	3700	150.886	0.406548	95.9276	100	90	0.402073
Foz do Iguaçu (PR)	Foz do Iguaçu	PR	South	256088	37482.8	0.751	0.748	0.858	0.661	54.18	45.13	Cfa	217.85	21.01	150.62	-25.5273	-54.5784	263	6109	934	6142	8466	21914	8557.21	23	228	70	226	322	869	339.336	0.881008	74.6606	99.5475	77.8	1.40985
Franca (SP)	Franca	SP	Southeast	318640	21804.8	0.78	0.749	0.842	0.753	52.31	40.83	Cwb	909.13	19.54	134.38	-20.5391	-47.4043	31	1094	517	2328	3392	7362	2310.44	6	42	19	95	73	235	73.7509	0.555586	46.1538	90.9502	86.1	0.962322
Francisco Beltrao (PR)	Francisco Beltrao	PR	South	78943	24447.4	0.774	0.758	0.844	0.726	50.24	39.4	Cfa	662.221	18.4968	170.625	-26.0779	-53.0543	23	427	166	515	231	1362	1725.3	13	35	18	32	34	132	167.209	0.270139	34.3891	82.3529
Garanhuns (PE)	Garanhuns	PE	Northeast	129408	13228.1	0.664	0.662	0.795	0.556	30.14	24.36	As	759.67	21.42	75.78	-8.8831	-36.4975	98	102	175	1862	2845	5082	3927.11	11	40	25	62	38	176	136.004	0.437404	37.1041	81.448
Goiania (GO)	Goiania	GO	Midwest	1302001	29034.2	0.651	0.614	0.779	0.576	56.49	47.78	Aw	791.76	22.14	135.4	-16.6882	-49.2693	3873	58336	29514	75469	39053	206245	15840.6	236	1723	818	1937	1288	6002	460.983	0.867558	95.9276	100	86.6	2.30198
Governador Valadares (MG)	Governador Valadares	MG	Southeast	263689	16801.4	0.727	0.714	0.834	0.644	46.26	37.02	Aw	297.4	22.69	99.7	-18.8555	-41.9562	619	4678	1124	1279	1330	9030	3424.49	27	227	69	77	67	467	177.103	0.7952	65.6109	93.6652	63.5	1.26902
Gravatai (RS)	Gravatai	RS	South	255660	37904.8	0.736	0.727	0.862	0.636	49.92	35.59	Cfa	68.0409	18.5644	139.222	-29.9417	-50.9941	0	52	13	41	27	133	52.0222	11	54	47	114	88	314	122.819	0.348472	56.5611	26.2443	44.8	0.408093
Guarapari (ES)	Guarapari	ES	Southeast	105286	15389.4	0.731	0.746	0.837	0.626	42.95	32.71	Am	188.47	22.15	103.21	-20.6696	-40.5025	137	2849	498	1682	190	5356	5087.1	13	103	36	99	45	296	281.139	0.469528	54.7511	91.8552	47.6	2.35389
Guaratingueta (SP)	Guaratingueta	SP	Southeast	112072	35017.2	0.798	0.764	0.886	0.751	56.05	46.16	Cwa	850.19	18.22	129.91	-22.8081	-45.1947	30	603	506	2660	43	3842	3428.15	14	68	21	76	22	201	179.349	0.57403	39.3665	83.7104	63.5	1.84022
Guaruja (SP)	Guaruja	SP	Southeast	290752	21997.9	0.751	0.729	0.854	0.679	51.87	45.51	Af	37.79	22.23	225.56	-23.9944	-46.2587	240	2681	1421	2043	1044	7429	2555.1	30	368	155	297	196	1046	359.757	0.849377	78.733	93.2127	77.2	1.02689
Guarulhos (SP)	Guarulhos	SP	Southeast	1221979	38016.5	0.763	0.746	0.831	0.717	55.28	46.26	Cfb	806.54	18.38	120.7	-23.4529	-46.5337	218	4530	8765	31368	1456	46337	3791.96	21	180	224	901	349	1675	137.073	0.834533	85.0679	99.5475	89.2	0.856136
Guaxupe (MG)	Guaxupe	MG	Southeast	49430	29708.6	0.751	0.729	0.88	0.659	48.05	35.93	Cwb	945.05	18.84	127.93	-21.3058	-46.7093	1	691	42	651	463	1848	3738.62	0	44	10	39	11	104	210.399	0.604215	23.9819	51.1312
Hortolandia (SP)	Hortolandia	SP	Southeast	192692	44002.8	0.756	0.716	0.859	0.703	55.1	43.76	Cfa	612.4	19.88	109.62	-22.8535	-47.2154	193	4765	8689	13770	1272	28689	14888.5	4	17	52	89	19	181	93.9323	0.693362	33.9367	100	77.1	1.5838
Ibitinga (SP)	Ibitinga	SP	Southeast	53158	18598.4	0.747	0.738	0.846	0.667	47.44	38.29	Cwa	461.03	21.51	105.74	-21.7566	-48.8328	36	1356	89	1041	2066	4588	8630.87	5	77	12	59	131	284	534.256	0.730824	39.3665	73.7557	68.8	1.85201
Ilheus (BA)	Ilheus	BA	Northeast	184236	17369.3	0.69	0.688	0.808	0.59	35.07	30.8	Af	110.16	24.77	127.31	-14.7932	-39.0462	165	2470	707	5614	5147	14103	7654.86	11	70	18	49	42	190	103.129	0.544248	36.6516	98.6425
Imperatriz (MA)	Imperatriz	MA	Northeast	247505	20040.7	0.731	0.697	0.803	0.698			Aw	159.1	27.35	123.26	-5.52048	-47.4759	43	252	131	207	571	1204	486.455	8	15	43	87	51	204	82.4226	0.360634	43.8914	66.5158
Indaiatuba (SP)	Indaiatuba	SP	Southeast	201619	46404.7	0.788	0.791	0.837	0.738	60.83	50.07	Cfa	627.51	19.67	109.28	-23.0887	-47.21	59	1075	503	2734	553	4924	2442.23	23	102	56	184	63	428	212.282	0.785736	61.086	84.6154	83.8	0.881503
Ipatinga (MG)	Ipatinga	MG	Southeast	239468	36879.6	0.771	0.752	0.864	0.705	57.45	45.98	Aw	497.19	21.36	118.42	-19.4717	-42.5496	1184	9325	586	771	5136	17002	7099.9	61	491	121	131	237	1041	434.714	0.899065	77.8281	95.4751	81.3	1.65634
Itaguai (RJ)	Itaguai	RJ	Southeast	109091	60616.9	0.715	0.703	0.814	0.638	41.07	29.74	Aw	171.28	21.74	116.74	-22.8638	-43.7778	36	897	79	848	50	1910	1750.83	0	49	17	86	46	198	181.5	0.362247	35.7466	71.0407	69.9	1.12736
Itajai (SC)	Itajai	SC	South	183373	77730.7	0.795	0.778	0.884	0.73	57.57	45.87	Cfa	67.55	20.46	143.89	-26.9103	-48.6729	7	76	73	6943	119	7218	3936.24	1	26	22	218	101	368	200.684	0.697213	50.2262	67.8733	70.6	3.1591
Itajuba (MG)	Itajuba	MG	Southeast	90658	25330.8	0.787	0.767	0.884	0.718	56.34	44.31	Cwb	1072.44	17.23	141.75	-22.4229	-45.461	1	51	41	2308	53	2454	2706.88	2	16	18	66	22	124	136.778	0.651768	23.5294	48.8688	75.7	1.1851
Itanhaem (SP)	Itanhaem	SP	Southeast	87057	13939.8	0.745	0.716	0.823	0.701	41.72	32.21	Af	201.18	21.34	178.95	-24.1815	-46.7858	23	838	309	4854	33	6057	6957.51	6	77	22	135	24	264	303.25	0.58975	37.5566	76.9231	73.5	1.79949
Itaperuna (RJ)	Itaperuna	RJ	Southeast	95841	19425.9	0.73	0.716	0.837	0.649	38.97	31.04	Aw	192.76	22.1	102.41	-21.2005	-41.8821	81	6694	352	2258	3586	12971	13533.9	5	55	19	27	26	132	137.728	0.505643	27.6018	95.4751
Itapetininga (SP)	Itapetininga	SP	Southeast	144377	22389.4	0.763	0.728	0.864	0.705	46.41	37.7	Cfa	670.94	19.28	103.73	-23.5887	-48.0505	12	184	110	981	36	1323	916.351	10	15	14	80	45	164	113.592	0.521203	33.9367	66.5158
Itapevi (SP)	Itapevi	SP	Southeast	200769	39198.5	0.735	0.687	0.855	0.677	43.36	33.81	Cfb	830.08	18.27	123.7	-23.5495	-46.9345	15	283	1014	3540	180	5032	2506.36	1	14	15	55	11	96	47.8161	0.565676	24.8869	80.9955
Itapira (SP)	Itapira	SP	Southeast	68537	37002.1	0.762	0.75	0.852	0.692	55.09	45.78	Cwa	717.42	19.48	121.28	-22.4362	-46.823	30	209	1173	6399	65	7876	11491.6	0	6	25	43	4	78	113.807	0.473362	17.1946	81.448
Itauna (MG)	Itauna	MG	Southeast	85463	26699.6	0.758	0.749	0.85	0.685	53.29	40.92	Cwb	898.05	19.23	128.03	-20.0826	-44.5806	23	3902	162	1811	3592	9490	11104.2	6	116	12	25	48	207	242.21	0.644004	31.6742	68.7783	72.4	2.29646
Itu (SP)	Itu	SP	Southeast	154147	40644.7	0.773	0.782	0.854	0.692	57.19	48.01	Cfa	651.49	19.44	110.62	-18.9748	-49.462	37	3594	1507	5399	3314	13851	8985.58	14	85	37	108	40	284	184.24	0.707297	47.5113	91.4027	64.4	2.01144
Ituiutaba (MG)	Ituiutaba	MG	Southeast	97171	24953.1	0.739	0.745	0.84	0.644	40.72	32.57	Aw	567.67	22.38	124.71	-18.4092	-49.2205	152	2958	797	1688	2404	7999	8231.88	7	108	10	14	14	153	157.454	0.502258	26.6968	91.4027	72.8	1.60773
Itumbiara (GO)	Itumbiara	GO	Midwest	92883	37431.5	0.752	0.744	0.838	0.682	40.96	32.33	Aw	552.69	22.71	132.32	-23.2552	-47.2934	57	1585	256	3537	397	5832	6278.87	5	220	20	25	26	296	318.68	0.224713	34.3891	75.5656	63.2	2.39438
Jaboatao dos Guararapes (PE)	Jaboatao dos Guararapes	PE	Northeast	644620	17691	0.717	0.692	0.83	0.642	37	30.8	As	63.09	25.57	132.65	-8.16918	-35	332	1466	1592	7746	4676	15812	2452.92	9	26	21	108	71	235	36.4556	0.785086	38.914	99.095	73.6	0.881105
Jaboticabal (SP)	Jaboticabal	SP	Southeast	71662	27375.9	0.778	0.778	0.851	0.71	54.72	46.51	Cwa	589.04	21.06	114.5	-21.2526	-48.3265	32	1301	259	604	1108	3304	4610.53	7	59	11	41	20	138	192.571	0.47353	28.0543	84.6154
Jacarei (SP)	Jacarei	SP	Southeast	211214	37168	0.777	0.749	0.837	0.749	56.82	46.02	Cfa	633.61	19.3	116.33	-23.2981	-45.9687	69	532	1306	8094	240	10241	4848.64	15	57	32	161	42	307	145.35	0.630574	47.9638	94.5701	76.8	1.37542
Janauba (MG)	Janauba	MG	Southeast	66803	10476.3	0.696	0.654	0.796	0.649	26.64	16.4	As	563.09	22.66	79.4	-15.8058	-43.3165	28	2025	58	361	519	2991	4477.34	1	28	2	7	3	41	61.3745	0.785173	11.3122	58.371
Jandira (SP)	Jandira	SP	Southeast	108344	25055.3	0.76	0.738	0.841	0.706	51.7	43.14	Cfb	790.94	18.47	120.66	-23.5285	-46.9032	10	232	682	3045	158	4127	3809.16	1	10	18	95	4	128	118.142	0.647801	22.6244	70.5882	81.6	1.21991
Jau (SP)	Jau	SP	Southeast	131040	23686.3	0.778	0.768	0.886	0.693	58.76	49	Cfa	564.47	20.67	109.93	-22.3024	-48.5754	16	987	6941	1569	72	9585	7314.56	5	35	99	24	18	181	138.126	0.814338	34.3891	82.3529	74.3	2.24636
Joao Monlevade (MG)	Joao Monlevade	MG	Southeast	73610	27601.6	0.758	0.724	0.849	0.708	52.63	42.1	Cwb	838.65	19.33	127.69	-19.8128	-43.1743	16	1805	54	176	3898	5949	8081.78	3	78	15	11	36	143	194.267	0.445563	28.5068	59.276	76.2	1.74821
Joao Pessoa (PB)	Joao Pessoa	PB	Northeast	723515	19284.9	0.763	0.77	0.832	0.693	48.34	41.51	As	31.38	25.87	152.05	-7.11935	-34.8467	872	3329	2388	4843	6435	17867	2469.47	145	501	182	378	411	1617	223.492	0.461342	90.0452	99.5475	81.2	0.666294
Joinville (SC)	Joinville	SC	South	515288	40184.1	0.809	0.795	0.889	0.749	63.47	50.65	Cfa	311.33	19.69	145.28	-26.3063	-48.8473	11	100	57	358	29	555	107.707	23	168	70	194	182	637	123.62	0.256933	71.9457	64.7059	52.5	0.806576
Juazeiro do Norte (CE)	Juazeiro do Norte	CE	Northeast	249939	12327.8	0.694	0.644	0.81	0.642			As	406.64	24.64	86.26	-7.22971	-39.3141	14	347	298	1291	388	2338	935.428	3	24	17	28	21	93	37.2091	0.264177	23.5294	78.2805
Juiz de Fora (MG)	Juiz de Fora	MG	Southeast	516247	24323.5	0.778	0.784	0.844	0.711	57.64	47.79	Cwb	761.34	18.87	126.34	-21.7616	-43.3427	47	5832	1015	4549	24233	35676	6910.65	25	507	149	370	1126	2177	421.697	0.926502	82.3529	92.3077	87.2	1.36183
Jundiai (SP)	Jundiai	SP	Southeast	370126	92970.4	0.822	0.834	0.866	0.768	66.12	56.12	Cfb	824.63	18.5	114.7	-23.1872	-46.8985	73	676	1369	8207	503	10828	2925.49	34	136	92	216	81	559	151.03	0.699964	70.5882	91.4027	78.5	1.35953
Lages (SC)	Lages	SC	South	156727	22767.8	0.77	0.755	0.867	0.697	47.81	36.28	Cfb	986.791	15.1919	140.391	-27.8155	-50.3264	1	8	3	20	7	39	24.884	4	20	34	63	44	165	105.279	0.268734	36.6516	12.6697
Lagoa Santa (MG)	Lagoa Santa	MG	Southeast	52520	24627.9	0.777	0.79	0.857	0.693	51.75	38.72	Cwa	754.944	20.0872	128.639	-19.6336	-43.8975	0	1926	198	1148	3168	3168	6031.99	1	59	14	24	66	164	312.262	0.787308	8.1448	14.9321
Leme (SP)	Leme	SP	Southeast	91756	23670.2	0.744	0.729	0.851	0.665	49.32	38.87	Cwa	642.63	20.13	114.31	-22.182	-47.3851	81	5163	140	486	50	5920	6451.89	2	270	10	48	11	341	371.638	0.763983	29.4118	73.7557	84.3	1.03973
Leopoldina (MG)	Leopoldina	MG	Southeast	51130	15358.4	0.726	0.696	0.867	0.635	38.01	30.98	Aw	324.17	21.32	111.34	-21.5305	-42.6434	35	2843	42	229	937	4086	7991.39	3	93	5	4	8	113	221.005	0.625474	19.0045	56.1086
Limeira (SP)	Limeira	SP	Southeast	276022	35620.4	0.775	0.761	0.852	0.719	57.82	46.37	Cwa	588.38	20.19	110.08	-22.5664	-47.3991	75	2165	1213	24863	111	28427	10298.8	76	130	73	502	55	836	302.874	0.865027	63.3484	92.3077	79.4	2.46605
Londrina (PR)	Londrina	PR	South	506701	29635	0.778	0.789	0.837	0.712	62.67	53.64	Cfa	570.24	20.28	131.23	-23.3046	-51.173	1130	8062	8123	11043	5815	34173	6744.21	50	350	209	338	271	1218	240.378	0.733907	86.8778	100	63	0.907029
Luis Eduardo Magalhaes (BA)	Luis Eduardo Magalhaes	BA	Northeast	60105	46057.6	0.716	0.754	0.826	0.59	33.38	22.31	Aw	810.51	22.87	124.62	-12.0899	-45.7815	9	974	202	2765	27	3977	6616.75	1	15	2	5	8	31	51.5764	0.11523	9.04977	60.6335
Macae (RJ)	Macae	RJ	Southeast	206728	85463	0.764	0.792	0.828	0.681	52.42	43.04	Aw	236.87	21.28	102.04	-22.3832	-41.7829	60	4290	71	859	1235	6515	3151.48	8	153	56	138	129	484	234.124	0.628067	58.8235	79.638	63.6	2.6403
Macapa (AP)	Macapa	AP	North	398204	18862.7	0.733	0.723	0.82	0.663	35.44	24.1	Am	16.71	27.59	236.53	-0.033794	-51.0742	851	989	546	1931	778	5095	1279.49	224	460	171	307	245	1407	353.336	0.486841	85.0679	97.7376	77.4	0.558868
Maceio (AL)	Maceio	AL	Northeast	932748	16439.5	0.721	0.739	0.799	0.635	41.08	41.08	Am	58.91	25.56	142.73	-9.65166	-35.7121	2236	3990	5873	3706	4343	20148	2160.07	61	207	145	258	216	887	95.0954	0.263927	87.3303	98.6425	52.8	1.05891
Mairipora (SP)	Mairipora	SP	Southeast	80956	16367.1	0.788	0.767	0.881	0.723	48.86	40.55	Cfb	908.1	17.9	119.81	-23.318	-46.5895	7	100	5508	1058	24	6697	8272.39	1	18	55	17	10	101	124.759	0.77914	20.362	65.1584	72.3
Manaus (AM)	Manaus	AM	North	1802014	32300.6	0.737	0.738	0.826	0.658	40.53	27.69	Af	66.97	26.77	202.2	-3.11641	-60.0171	1443	16354	4338	3184	5550	30869	1713.03	206	1585	562	815	820	3988	221.308	0.778462	95.4751	100	83.5	0.681304
Mariana (MG)	Mariana	MG	Southeast	54219	114348	0.742	0.705	0.874	0.664	46.98	37.38	Cwa	780.37	19.46	130.96	-20.3725	-43.4219	6	386	33	56	480	961	1772.44	1	24	7	10	19	61	112.507	0.252486	14.9321	47.5113
Marica (RJ)	Marica	RJ	Southeast	127461	51533.2	0.765	0.761	0.85	0.692	47.76	36.5	Aw	63.08	22.13	100.76	-22.9334	-42.8263	113	2956	107	155	94	3425	2687.1	4	116	27	28	34	209	163.972	0.371182	37.5566	60.181	72.3	1.53118
Marilia (SP)	Marilia	SP	Southeast	216745	37241.9	0.798	0.768	0.854	0.776	58.13	47.14	Cfa	508.45	21.2	107.86	-22.218	-49.9517	383	2560	3252	10469	472	17136	7906.06	25	149	30	280	59	543	250.525	0.754969	55.6561	94.5701	67.8	1.98916
Maringa (PR)	Maringa	PR	South	357077	35602.2	0.808	0.806	0.852	0.768	69.18	58.58	Cfa	483.87	20.84	110.41	-23.4204	-51.9342	142	6162	7689	4834	3039	21866	6123.61	33	376	251	232	355	1247	349.224	0.631025	80.0905	95.0226	61.6	2.99942
Matao (SP)	Matao	SP	Southeast	76786	39294.9	0.773	0.766	0.847	0.713	57.52	48.08	Cwa	584.594	20.9044	112.972	-21.6058	-48.3642	480	1435	218	776	2176	2176	2833.85	3	27	7	26	41	104	135.441	0.695331	7.23982	14.4796
Maua (SP)	Maua	SP	Southeast	417064	23012.7	0.766	0.721	0.852	0.733	53.94	42.76	Cfb	809.54	18.21	143.98	-23.6678	-46.4609	12	204	505	2024	559	3304	792.205	6	44	26	98	66	240	57.5451	0.600312	42.9864	79.638	73.8	1.19364
Mesquita (RJ)	Mesquita	RJ	Southeast	168376	11090.5	0.737	0.704	0.839	0.678	51.36	40.96	Aw	555.863	21.1111	118.845	-22.7812	-43.4306	38	667	35	106	235	1081	642.015	2	26	22	72	114	236	140.162	0.347139	32.5792	54.7511	70.5	0.769112
Mineiros (GO)	Mineiros	GO	Midwest	52935	30143.8	0.718	0.753	0.84	0.584	35.2	27.14	Aw	747.07	22.35	155.29	-17.5623	-52.5496	17	3098	722	3495	740	8072	15248.9	2	84	15	38	27	166	313.592	0.573003	25.3394	92.3077	75.3	1.04424
Mococa (SP)	Mococa	SP	Southeast	66290	24917.8	0.762	0.756	0.827	0.709	48.45	36.41	Cwa	665.16	20.33	122.85	-21.465	-47.015	10	863	778	3428	270	5349	8069.09	1	25	9	50	12	97	146.327	0.632798	21.7195	76.0181
Mogi das Cruzes (SP)	Mogi das Cruzes	SP	Southeast	387779	31133.5	0.783	0.762	0.851	0.74	55.56	45.81	Cfb	784.32	18.35	163.43	-23.5137	-46.1858	15	127	433	1984	369	2928	755.069	12	115	92	235	101	555	143.123	0.627578	66.0633	79.1855	74.2	1.11976
Mogi Guaçu (SP)	Mogi Guaçu	SP	Southeast	137245	32137.1	0.774	0.74	0.852	0.736	57.77	47.61	Cwa	648.75	20.01	117.37	-22.369	-46.941	67	771	2093	12433	131	15495	11290	4	9	31	101	4	149	108.565	0.872047	20.362	87.3303	68.3	2.60756
Mogi Mirim (SP)	Mogi Mirim	SP	Southeast	86505	37441.8	0.784	0.767	0.879	0.715	58.25	48.19	Cwa	658.95	19.83	114.05	-22.4323	-46.9519	60	487	1944	2550	189	5230	6045.89	0	2	5	31	11	49	56.6441	0.288024	12.6697	90.0452
Mongagua (SP)	Mongagua	SP	Southeast	46293	13672.1	0.754	0.719	0.854	0.699	41.26	34.66	Af	117.97	21.78	210.07	-24.1075	-46.6816	20	400	414	927	29	1790	3866.68	0	23	5	76	11	115	248.418	0.50151	21.267	70.1357
Montes Claros (MG)	Montes Claros	MG	Southeast	361915	18278.8	0.77	0.707	0.868	0.744	43.63	33.9	As	780.58	21.24	91.34	-16.7284	-43.8579	420	5367	244	1742	2163	9936	2745.4	78	632	120	179	150	1159	320.241	0.853906	73.7557	85.5204	70.7	2.61735
Mossoro (RN)	Mossoro	RN	Northeast	259815	23325.1	0.72	0.694	0.811	0.663	37.68	29.31	BSh	55.03	26.49	66.14	-5.18498	-37.3482	211	558	615	1994	3022	6400	2463.29	57	91	48	96	112	404	155.495	0.544862	55.2036	95.9276	70	1.30212
Muriae (MG)	Muriae	MG	Southeast	100765	16488.2	0.734	0.731	0.853	0.634	41.76	31.77	Cwa	434.4	20.87	111.01	-21.1336	-42.3886	3	2550	100	944	3351	6948	6895.25	7	227	18	41	55	348	345.358	0.581375	40.2715	67.4208	65.8	2.95231
Natal (RN)	Natal	RN	Northeast	803739	23412.5	0.763	0.768	0.835	0.694	46.77	39.28	As	40.89	26.03	114.15	-5.78045	-35.2023	936	4443	3777	7861	13291	30308	3770.88	212	804	332	624	594	2566	319.258	0.6443	92.3077	100	73.3	0.763239
Navirai (MS)	Navirai	MS	Midwest	46424	24030.2	0.7	0.715	0.803	0.597	36.14	28.08	Cfa	308.19	21.99	135	-23.0618	-54.2009	251	3600	218	733	1008	5810	12515.1	2	38	4	4	5	53	114.165	0.617519	12.2172	75.1131
Nilopolis (RJ)	Nilopolis	RJ	Southeast	157425	15960.4	0.753	0.731	0.817	0.716	55.57	44.78	Aw	25.74	22.52	117.5	-22.8099	-43.4202	30	355	18	134	331	868	551.374	4	47	22	75	85	233	148.007	0.629903	38.4615	57.0136	65.8	0.749453
Niteroi (RJ)	Niteroi	RJ	Southeast	487562	40284.3	0.837	0.887	0.854	0.773	69.2	62.72	Am	74.72	22.11	104.85	-22.8864	-43.1143	269	12426	416	691	1542	15344	3147.09	68	906	221	439	430	2064	423.331	0.825063	90.9502	94.5701	84.6	1.22359
Nova Andradina (MS)	Nova Andradina	MS	Midwest	45585	28628.6	0.721	0.716	0.85	0.616	38.77	30.18	Aw	348.79	22.35	131.79	-22.2383	-53.3448	18	1998	9	222	451	2698	5918.61	1	67	4	5	4	81	177.69	0.86428	14.4796	40.2715
Nova Friburgo (RJ)	Nova Friburgo	RJ	Southeast	182082	20185.9	0.745	0.758	0.846	0.645	51.56	43.77	Cwb	1089.47	16.37	108.57	-22.2892	-42.5405	10	1407	33	362	5008	6820	3745.57	12	92	37	69	330	540	296.57	0.849897	51.5837	61.086	75.3	1.44797
Nova Iguaçu (RJ)	Nova Iguaçu	RJ	Southeast	796257	16477.6	0.713	0.691	0.818	0.641	43.71	33.39	Af	214.83	21.51	139.8	-22.7544	-43.4697	191	2808	548	1571	520	5638	708.063	17	137	82	171	177	584	73.3432	0.400515	71.0407	95.0226	61.5	1.37855
Nova Lima (MG)	Nova Lima	MG	Southeast	80998	109299	0.813	0.864	0.885	0.704	61.01	49.94	Cwb	1119.45	17.8	129.83	-19.9944	-43.8478	18	1011	158	394	4630	6211	7668.09	2	56	23	23	88	192	237.043	0.796078	31.2217	79.1855	82.2	1.21829
Nova Odessa (SP)	Nova Odessa	SP	Southeast	51242	43537.8	0.791	0.755	0.861	0.762	59.16	47.64	Cfa	591.95	20.05	107.46	-22.7833	-47.2963	22	306	739	3207	141	4415	8615.98	2	45	52	60	10	169	329.808	0.621529	32.1267	76.0181	85.8	0.903418
Novo Hamburgo (RS)	Novo Hamburgo	RS	South	238940	28335.5	0.747	0.778	0.852	0.629	50.5	38.85	Cfa	76.9537	18.644	146.854	-29.6868	-51.1354	4	17	8	30	15	74	30.9701	14	73	35	43	70	235	98.3511	0.133215	47.9638	24.8869	25.4	0.339605
Olinda (PE)	Olinda	PE	Northeast	377779	12409.6	0.735	0.704	0.836	0.675	40.53	32.73	Am	20.36	25.83	159.25	-7.9906	-34.8421	215	1017	918	3755	1561	7466	1976.29	15	54	54	178	141	442	117	0.581483	59.276	99.5475	67.6	0.756881
Osasco (SP)	Osasco	SP	Southeast	666740	80265.4	0.776	0.776	0.84	0.718	60.92	52.62	Cfb	765.32	18.6	121.17	-23.5334	-46.7945	89	748	8959	4329	663	14788	2217.96	18	121	490	359	175	1163	174.431	0.845412	80.543	93.6652	91.3	0.825002
Ourinhos (SP)	Ourinhos	SP	Southeast	103035	22986.3	0.778	0.753	0.859	0.727	53.41	43.49	Cfa	445.4	21.09	115.09	-22.98	-49.871	9	240	426	6514	90	7279	7064.59	6	49	18	74	13	160	155.287	0.530219	33.9367	75.1131
Ouro Preto (MG)	Ouro Preto	MG	Southeast	70281	90705.3	0.741	0.721	0.834	0.677	50.28	37.59	Cwb	1131.6	17.49	131.2	-20.3753	-43.621	2	192	41	72	251	558	793.956	3	40	11	35	42	131	186.395	0.448402	28.9593	48.8688
Palmas (TO)	Palmas	TO	North	228332	22583.6	0.788	0.789	0.827	0.749			Aw	409.91	25.67	140.87	-10.2513	-48.328	1166	8435	4272	9028	1851	24752	10840.4	34	163	91	163	140	591	258.834	0.447639	72.3982	100	74.2	0.536479
Para de Minas (MG)	Para de Minas	MG	Southeast	84215	24369.7	0.725	0.715	0.848	0.628	45.35	33.5	Cwa	829.76	19.73	122.63	-19.8602	-44.6099	18	2013	141	457	3771	6400	7599.6	3	104	7	17	42	173	205.427	0.537848	25.7919	75.1131	74	2.13529
Paraguaçu Paulista (SP)	Paraguaçu Paulista	SP	Southeast	42278	20302.3	0.762	0.717	0.836	0.739	49.54	41.03	Cfa	475.41	21.28	111.1	-22.4133	-50.5783	9	1557	274	6975	88	8903	21058.2	1	31	14	105	17	168	397.37	0.781055	27.6018	74.6606	74.1	2.05335
Paraiba do Sul (RJ)	Paraiba do Sul	RJ	Southeast	41084	18063.9	0.702	0.697	0.812	0.61	41.92	31.42	Cwa	522.27	19.97	122.21	-22.158	-43.2993	0	762	12	80	589	1443	3512.32	3	63	2	17	18	103	250.706	0.563801	18.0995	31.2217
Paranagua (PR)	Paranagua	PR	South	140469	41557	0.75	0.733	0.852	0.676	48.45	35.23	Cfa	66.1946	21.3887	168.379	-25.5164	-48.5239	8	26	29	1284	14094	15441	10992.5	14	29	18	186	1407	1654	1177.48	0.854106	47.9638	60.6335	84.7	2.08718
Paranavai (PR)	Paranavai	PR	South	81590	20334.5	0.763	0.75	0.844	0.703	54.34	41.78	Cfa	409.85	21.5	112.21	-23.0824	-52.4628	178	10393	562	1069	133	12335	15118.3	4	158	21	30	26	239	292.928	0.86907	34.3891	88.2353	82.8	1.28238
Parnaiba (PI)	Parnaiba	PI	Northeast	145705	9247.53	0.687	0.658	0.816	0.604	24.47	18.66	As	19.61	27.52	108.01	-2.90546	-41.7743	114	559	209	598	103	1583	1086.44	9	61	31	54	49	204	140.009	0.229611	38.009	76.0181	79.2	0.692333
Parnamirim (RN)	Parnamirim	RN	Northeast	202456	14514.2	0.766	0.75	0.825	0.726	49.9	40.96	As	41.69	26.02	108.09	-5.91168	-35.2743	198	2039	904	1666	869	5676	2803.57	15	47	23	28	23	136	67.1751	0.356128	32.5792	98.6425
Passo Fundo (RS)	Passo Fundo	RS	South	184826	36928.9	0.776	0.787	0.849	0.699	55.05	43.54	Cfb	612.25	17.18	160.11	-28.2595	-52.4111	2	9	12	54	32	109	58.9744	6	55	39	57	65	222	120.113	0.277043	46.1538	29.4118
Passos (MG)	Passos	MG	Southeast	106290	17481.3	0.756	0.741	0.886	0.658	45.55	35.31	Cwa	817.75	19.8	135.28	-20.722	-46.615	13	1008	4923	1414	1220	8578	8070.37	2	47	89	35	25	198	186.283	0.651679	40.2715	88.2353	81	1.15621
Pato Branco (PR)	Pato Branco	PR	South	72370	32621.6	0.782	0.778	0.845	0.728	60.6	49.69	Cfa	717.82	18.11	163.1	-26.2303	-52.6732	3	41	35	259	82	420	580.351	0	22	27	129	132	310	428.354	0.23866	34.8416	47.5113	56.6	0.668416
Patos (PB)	Patos	PB	Northeast	100674	11067.5	0.701	0.667	0.821	0.628	26.35	19.67	BSh	268.07	25.03	60.47	-18.5876	-46.5161	38	287	109	333	432	1199	1190.97	23	72	10	24	29	158	156.942	0.296855	32.1267	55.2036
Patos de Minas (MG)	Patos de Minas	MG	Southeast	138710	21422	0.765	0.749	0.855	0.698	47.98	38.24	Cwa	882.9	20.42	120.63	-7.01842	-37.2758	27	2682	2013	1317	1617	7656	5519.43	8	129	42	44	41	264	190.325	0.71351	44.3439	89.5928	81.3	0.98346
Paulinia (SP)	Paulinia	SP	Southeast	82146	131151	0.795	0.8	0.864	0.727	65.19	53.01	Cfa	592.67	20.05	110.46	-22.7647	-47.1507	75	1644	2238	5477	176	9610	11698.7	4	36	29	57	29	155	188.688	0.640221	35.2941	91.4027
Paulista (PE)	Paulista	PE	Northeast	300466	11686.2	0.732	0.673	0.83	0.703	41.25	31.89	Am	38.85	25.73	161.51	-7.93478	-34.8686	127	498	649	3228	1098	5600	1863.77	12	93	43	167	65	380	126.47	0.522759	53.3937	99.5475	57.3	1.1298
Pederneiras (SP)	Pederneiras	SP	Southeast	41497	44912.2	0.739	0.738	0.812	0.673	51.53	39.82	Cfa	527.76	20.9	112.26	-22.3435	-48.7752	4	195	141	943	139	1422	3426.75	2	10	5	30	7	54	130.13	0.443176	14.0271	63.3484
Pedro Leopoldo (MG)	Pedro Leopoldo	MG	Southeast	58740	25531.9	0.757	0.723	0.856	0.7	48.99	37.14	Cwa	804.38	19.84	125.68	-19.6163	-44.0413	13	2120	68	1090	1507	4798	8168.2	1	104	5	15	19	144	245.148	0.75385	19.457	64.2534	80.9	1.06376
Pelotas (RS)	Pelotas	RS	South	328275	17353.2	0.739	0.758	0.844	0.632	54.27	44.48	Cfa	73.84	17.31	124.2	-31.7655	-52.3418	0	29	4	11	13	57	17.3635	20	70	62	140	129	421	128.246	0.188201	65.6109	14.0271	48.3	0.221775
Peruibe (SP)	Peruibe	SP	Southeast	59773	19300.6	0.749	0.73	0.854	0.675	41.25	31.7	Af	101.96	21.79	167.7	-24.3119	-47.0021	17	1127	406	2255	102	3907	6536.4	3	82	22	142	15	264	441.671	0.498621	34.3891	67.4208	73.9	1.50958
Petrolina (PE)	Petrolina	PE	Northeast	293962	15334.3	0.697	0.695	0.799	0.611	31.36	25.52	BSh	420.6	24.61	41.77	-9.38972	-40.5034	59	264	1787	2084	345	4539	1544.08	7	28	33	60	40	168	57.1502	0.273848	34.8416	95.0226
Petropolis (RJ)	Petropolis	RJ	Southeast	295917	31753.7	0.745	0.763	0.847	0.639	53.85	42.93	Cfb	1001.38	17.04	145.32	-22.5125	-43.1802	18	419	58	333	804	1632	551.506	14	154	70	132	353	723	244.325	0.699624	73.3032	68.3258	73.6	0.879776
Pindamonhangaba (SP)	Pindamonhangaba	SP	Southeast	146995	35853.4	0.773	0.745	0.843	0.736	52.86	42.1	Cwa	728.53	18.9	132.57	-22.9247	-45.4628	78	2466	6785	4782	438	14549	9897.62	5	40	42	32	14	133	90.4793	0.593053	33.4842	95.9276
Piracicaba (SP)	Piracicaba	SP	Southeast	364571	52619.8	0.785	0.797	0.848	0.717	61.19	50.38	Cfa	536.53	20.46	106.73	-22.7359	-47.6496	226	4857	2647	9084	2446	19260	5282.92	60	258	110	324	104	856	234.797	0.784304	80.543	97.7376	85.3	0.815034
Pirassununga (SP)	Pirassununga	SP	Southeast	70081	27731.1	0.801	0.789	0.884	0.736	62.14	51.35	Cwa	639.53	20.25	115.33	-21.9965	-47.427	19	482	208	4621	107	5437	7758.17	1	33	4	122	23	183	261.126	0.708282	32.1267	76.0181	73.9	1.51071
Poa (SP)	Poa	SP	Southeast	106013	46993	0.771	0.71	0.856	0.754	54.09	45.17	Cfb	766.222	18.5041	129.111	-23.5331	-46.348	2	50	83	835	237	1207	1138.54	5	48	39	68	42	202	190.543	0.377725	41.1765	63.3484
Poços de Caldas (MG)	Poços de Caldas	MG	Southeast	152435	36263.9	0.779	0.768	0.872	0.706	58.69	45.75	Cwb	1234.02	16.97	133.6	-21.7813	-46.563	6	43	83	601	88	821	538.59	8	31	28	61	34	162	106.275	0.472529	36.6516	54.7511	55.2	1.06892
Ponta Grossa (PR)	Ponta Grossa	PR	South	311611	31052.1	0.763	0.755	0.837	0.703	51.27	38.64	Cfb	879.47	17.62	128.74	-25.0823	-50.1597	1	30	24	63	52	170	54.5552	24	66	48	75	107	320	102.692	0.32248	55.6561	40.724	33.6	0.511635
Ponte Nova (MG)	Ponte Nova	MG	Southeast	57390	19000.9	0.717	0.714	0.848	0.608	41.17	33	Cwa	542.88	20.7	120.97	-20.4117	-42.8992	19	1775	47	45	587	2473	4309.11	0	58	7	7	20	92	160.307	0.675574	19.9095	49.7738
Porto Alegre (RS)	Porto Alegre	RS	South	1409351	39091.6	0.805	0.867	0.857	0.702	66.89	58.47	Cfa	41.34	18.56	128.07	-30.0349	-51.2242	19	1187	260	579	367	2412	171.143	318	2212	780	2474	1391	7175	509.1	0.710188	92.7602	85.5204	76.1	0.836191
Porto Ferreira (SP)	Porto Ferreira	SP	Southeast	51400	26945.2	0.751	0.736	0.827	0.696	55.51	44.16	Cwa	603.06	20.53	118.21	-21.8543	-47.4788	15	335	1278	4674	238	6540	12723.7	3	15	17	67	7	109	212.062	0.641821	28.0543	85.5204
Porto Velho (RO)	Porto Velho	RO	North	428527	23638.8	0.736	0.764	0.819	0.638	42.87	35.14	Am	120.26	25.86	208.15	-8.76164	-63.9016	135	1523	878	558	802	3896	909.161	43	227	101	113	175	659	153.783	0.668506	72.3982	98.19	63	1.05002
Pouso Alegre (MG)	Pouso Alegre	MG	Southeast	130615	36439.7	0.774	0.755	0.872	0.704	55.46	43.32	Cfb	876.71	18.53	134.25	-22.2277	-45.9422	5	109	108	1108	56	1386	1061.13	2	42	16	27	22	109	83.4514	0.140096	26.6968	66.9683
Praia Grande (SP)	Praia Grande	SP	Southeast	262051	17207.4	0.754	0.744	0.834	0.692	52.73	43.94	Af	108.83	21.85	232.24	-24.0094	-46.4165	78	9235	644	3676	661	14294	5454.66	29	473	95	256	81	934	356.419	0.90366	70.5882	91.4027	85.6	1.2431
Presidente Prudente (SP)	Presidente Prudente	SP	Southeast	207610	26167.1	0.806	0.788	0.858	0.774	60.06	50.17	Aw	390.65	22.01	104.04	-22.1218	-51.3981	313	7889	1530	6477	13488	29697	14304.2	20	207	105	119	136	587	282.742	0.657142	66.5158	99.5475	69	2.27524
Recife (PE)	Recife	PE	Northeast	1537704	29037.2	0.772	0.798	0.825	0.698	47.68	41.6	Am	32.92	25.76	153.28	-8.06005	-34.8899	735	3990	3535	29308	14999	52567	3418.54	263	1139	664	2385	2193	6644	432.073	0.738553	95.9276	100	81.6	0.882078
Registro (SP)	Registro	SP	Southeast	54261	29005.8	0.754	0.718	0.851	0.702	41.3	33.51	Af	36.42	22.1	141.73	-24.5002	-47.8448	12	2609	112	507	260	3500	6450.31	3	195	14	14	7	233	429.406	0.884612	23.0769	67.8733	81.1	0.926621
Resende (RJ)	Resende	RJ	Southeast	119769	72811.8	0.768	0.762	0.839	0.709	55.66	44.37	Cwa	700.7	19.09	130.96	-22.4711	-44.452	163	2102	1130	12008	660	16063	13411.7	7	102	11	103	26	249	207.9	0.574767	36.1991	94.5701	72.3	1.98461
Ribeirao Pires (SP)	Ribeirao Pires	SP	Southeast	113068	22380.2	0.784	0.749	0.847	0.76	59.93	49.14	Cfb	800.9	18.23	165.67	-23.7083	-46.4092	7	72	254	295	58	686	606.715	1	23	15	44	14	97	85.7891	0.424138	26.6968	62.4434
Ribeirao Preto (SP)	Ribeirao Preto	SP	Southeast	604682	36194.4	0.8	0.82	0.844	0.739	63.15	54.33	Cwa	607.6	20.9	127.23	-21.1713	-47.8198	823	29168	3211	11949	35068	80219	13266.3	81	1092	135	352	469	2129	352.086	0.751679	86.8778	100	80.5	1.66986
Rio Bonito (RJ)	Rio Bonito	RJ	Southeast	55551	23821.8	0.71	0.705	0.819	0.62	36.11	26.9	Aw	156.22	21.64	99.85	-22.7186	-42.6285	220	2473	24	13	41	2771	4988.21	5	112	11	13	16	157	282.623	0.621468	23.9819	48.8688	91.8	0.501829
Rio Branco (AC)	Rio Branco	AC	North	336038	18947	0.727	0.729	0.798	0.661	38.49	32.1	Am	209.03	24.45	177.93	-9.97585	-67.8273	1908	5587	4072	3854	644	16065	4780.71	32	162	132	195	203	724	215.452	0.180424	77.3756	99.095	71.6	0.761085
Rio Claro (SP)	Rio Claro	SP	Southeast	186253	38944.1	0.803	0.784	0.862	0.766	60.58	50.44	Cwa	615.55	20.2	112.02	-22.4138	-47.5722	82	2087	1373	21698	94	25334	13601.9	30	160	42	318	44	594	318.921	0.82477	61.991	93.6652	80.9	1.66098
Rio das Ostras (RJ)	Rio das Ostras	RJ	Southeast	105676	121800	0.773	0.784	0.854	0.689	53.68	42.61	Aw	36.21	22.38	96.01	-22.5264	-41.9475	124	5885	237	1342	399	7987	7558.01	7	235	55	225	109	631	597.108	0.573752	67.4208	89.5928	61.1	3.70203
Rio de Janeiro (RJ)	Rio de Janeiro	RJ	Southeast	6320446	43941.2	0.799	0.84	0.845	0.719	63.46	56.04	Am	85.4	22.12	115.83	-22.91	-43.1958	5116	69201	3709	20313	24908	123247	1949.97	1324	12692	3615	8017	8814	34462	545.246	0.798762	95.9276	99.5475	82.6	0.953063
Rio Grande (RS)	Rio Grande	RS	South	197228	39556.9	0.744	0.752	0.861	0.637	56.95	46.09	Cfa	6.63	17.12	114.75	-32.035	-52.1099	2	22	10	23	12	69	34.9849	37	83	94	195	372	781	395.988	0.236954	70.1357	24.8869	30.5	0.314867
Rio Verde (GO)	Rio Verde	GO	Midwest	176424	36539.1	0.754	0.765	0.853	0.656	38.69	29.9	Aw	765.42	22.07	147.96	-17.7931	-50.9237	77	6158	1186	3988	5961	17370	9845.6	9	69	5	23	25	131	74.2529	0.645287	28.5068	98.6425
Rondon do Para (PA)	Rondon do Para	PA	North	46964	8321.46	0.602	0.606	0.788	0.457	11.57	7.38	Aw	203.37	27.17	158.57	-4.77711	-48.0675	0	66	9	210		285	606.848	0	1	20	0		21	44.7151	-0.0279145	1.35747	25.7919
Rondonopolis (MT)	Rondonopolis	MT	Midwest	195476	32698.6	0.755	0.749	0.823	0.698	44.12	34.25	Aw	354.59	24.62	141.07	-16.4659	-54.6395	349	3322	688	2037	208	6604	3378.42	27	121	20	49	33	250	127.893	0.755582	40.724	88.2353	66.7	1.21389
Sabara (MG)	Sabara	MG	Southeast	126269	14946.2	0.731	0.699	0.833	0.67	50.98	37.78	Cwb	897.44	19.14	130.54	-19.8842	-43.8273	23	7259	487	591	10187	18547	14688.5	3	58	9	21	39	130	102.955	0.728048	25.7919	90.9502
Salvador (BA)	Salvador	BA	Northeast	2675656	18264.1	0.759	0.772	0.835	0.679	49.72	44.74	Af	17.68	25.76	153.97	-12.9752	-38.505	1008	2705	7782	7986	2952	22433	838.411	125	382	469	799	669	2444	91.3421	0.209861	93.2127	100	72	0.414857
Santa Barbara d'Oeste (SP)	Santa Barbara d'Oeste	SP	Southeast	180009	27241.9	0.781	0.752	0.867	0.731	60.85	53.16	Cfa	584.84	20.11	106.48	-22.7551	-47.4182	121	1159	5259	8722	490	15751	8750.12	3	17	27	45	18	110	61.1081	0.566816	30.3167	96.8326
Santa Luzia (MG)	Santa Luzia	MG	Southeast	202942	14813.2	0.715	0.682	0.859	0.625	46.13	33.24	Cwa	763.51	19.97	130.14	-19.7898	-43.9433	23	5019	356	871	4603	10872	5357.2	0	68	19	29	42	158	77.8548	0.601366	29.8643	89.5928	79.2	1.67453
Santa Maria (RS)	Santa Maria	RS	South	261031	20847.2	0.784	0.795	0.848	0.715	60.38	50.04	Cfa	103.441	18.6147	151.234	-29.6902	-53.8281	0	16	15	13	25	69	26.4336	9	74	38	91	107	319	122.208	0.359865	57.9186	22.6244	23.4	0.337393
Santana (AP)	Santana	AP	North	101262	16833.7	0.692	0.654	0.794	0.638	27.22	16.57	Am	24.21	27.61	234.45	-0.04583	-51.1745	131	183	70	414	58	856	845.332	60	63	10	22	10	165	162.944	0.197579	32.1267	78.733
Santarem (PA)	Santarem	PA	North	294580	11552.8	0.691	0.632	0.807	0.648	22.16	13.57	Am	80.83	27.46	180.26	-2.45056	-54.7025	274	2815	695	431	16	4231	1436.28	10	97	15	36	65	223	75.701	0.395547	42.9864	80.543	78.2	0.993527
Santo Andre (SP)	Santo Andre	SP	Southeast	676407	35503.5	0.815	0.819	0.861	0.769	68.34	61.4	Cfb	774.23	18.36	176.14	-23.6747	-46.5374	67	752	1489	3770	841	6919	1022.9	36	208	132	455	240	1071	158.337	0.719499	86.8778	96.8326	82.6	0.838793
Santo angelo (RS)	Santo angelo	RS	South	76275	22123.4	0.772	0.765	0.863	0.696	46.56	34.64	Cfa	273.65	18.93	175.51	-28.3007	-54.2685	1	13	22	484	29	549	719.764	5	17	16	42	25	105	137.66	0.614633	26.6968	27.6018
Santo Antonio da Platina (PR)	Santo Antonio da Platina	PR	South	42707	17646.5	0.718	0.733	0.817	0.617	40.08	28.96	Cfa	521.64	20.53	118.84	-23.2956	-50.0749	2	243	633	1784	76	2738	6411.13	0	2	14	12	9	37	86.6369	0.33	10.4072	74.6606
Santos (SP)	Santos	SP	Southeast	419400	44478.2	0.84	0.861	0.852	0.807	72.38	67.83	Af	260.66	21.07	224.61	-23.9677	-46.3297	481	12681	6581	6451	1860	28054	6689.08	85	2070	598	838	348	3939	939.199	0.867228	92.7602	100	79.5	1.52734
Santos Dumont (MG)	Santos Dumont	MG	Southeast	46284	12858	0.741	0.688	0.847	0.697	41.27	30	Cwb	838.602	18.5968	132.086	-21.4636	-43.5504	6	53	4	14	244	244	527.18	3	18	16	17	42	96	207.415	0.51649	6.78733	12.2172
Sao Bernardo do Campo (SP)	Sao Bernardo do Campo	SP	Southeast	765463	59149.8	0.805	0.807	0.861	0.752	66.51	58.36	Cfb	755.6	18.44	200.91	-23.6872	-46.5654	59	702	2995	8720	1273	13749	1796.17	20	108	125	403	272	928	121.234	0.715486	77.8281	94.5701	83.4	1.12899
Sao Caetano do Sul (SP)	Sao Caetano do Sul	SP	Southeast	149263	97889.9	0.862	0.891	0.887	0.811	77.62	74.07	Cfb	765.65	18.5	121.7	-23.6232	-46.5567	7	135	231	1076	151	1600	1071.93	10	50	23	123	60	266	178.209	0.583743	46.1538	75.5656	74.6	0.911586
Sao Carlos (SP)	Sao Carlos	SP	Southeast	221950	37652	0.805	0.788	0.863	0.766	62.66	53.57	Cwa	736.71	19.85	119.59	-22.0117	-47.897	75	1030	1020	7025	1301	10451	4708.72	16	127	54	337	99	633	285.199	0.631893	69.2308	94.1176	77.4	1.38574
Sao Gonçalo (RJ)	Sao Gonçalo	RJ	Southeast	999728	13714.6	0.739	0.711	0.833	0.681	48.18	37.43	Aw	57.39	22.25	106.69	-22.8283	-43.0648	296	17379	1324	2324	8067	29390	2939.8	10	211	78	188	119	606	60.6165	0.634136	71.4932	98.19	81.5	1.77769
Sao Joao da Boa Vista (SP)	Sao Joao da Boa Vista	SP	Southeast	83639	26299.2	0.797	0.776	0.871	0.749	55.61	44.81	Cwa	802.73	19.27	125.58	-21.9701	-46.7962	8	211	907	3857	76	5059	6048.61	2	31	17	109	26	185	221.189	0.59554	34.3891	74.6606	74.3	1.72265
Sao Joaquim da Barra (SP)	Sao Joaquim da Barra	SP	Southeast	46512	26196.3	0.762	0.74	0.847	0.706	52.54	42.32	Cwa	650.32	21.02	125.64	-20.5861	-47.8646	6	1350	132	882	678	3048	6553.15	1	66	4	9	4	84	180.599	0.550199	16.2896	56.5611
Sao Jose do Rio Preto (SP)	Sao Jose do Rio Preto	SP	Southeast	408258	30548.8	0.797	0.801	0.846	0.748	59.23	49.56	Aw	528.77	21.73	107.72	-20.813	-49.3772	1716	45544	5819	27828	16154	97061	23774.4	32	531	74	213	119	969	237.35	0.905411	68.3258	100	84.4	1.2926
Sao Jose dos Campos (SP)	Sao Jose dos Campos	SP	Southeast	629921	40699.3	0.807	0.804	0.855	0.764	64.86	54.11	Cfa	737.63	18.83	119.78	-23.2217	-45.9097	613	6817	9567	20832	1645	39474	6266.5	48	332	166	830	326	1702	270.193	0.869111	88.2353	100	64.9	1.0749
Sao Jose dos Pinhais (PR)	Sao Jose dos Pinhais	PR	South	264210	87697.3	0.758	0.749	0.859	0.678	55.21	41.97	Cfb	885.31	17.09	139.27	-25.5303	-49.2046	6	79	61	137	79	362	137.012	51	176	108	128	186	649	245.638	0.465229	79.1855	53.8462	44.3	0.669276
Sao Leopoldo (RS)	São Leopoldo	RS	South	214087	25958.8	0.739	0.766	0.861	0.612	51.11	38.8	Cfa	38.625	18.8291	144.099	-29.7549	-51.1545	0	12	2	13	9	36	16.8156	7	42	20	63	56	188	87.8148	0.268228	43.8914	11.7647
Sao Luis (MA)	Sao Luis	MA	Northeast	1014837	21948.8	0.768	0.741	0.813	0.752			Aw	15.09	27.82	169.05	-2.53902	-44.2846	276	1107	963	2137	4430	8913	878.269	49	308	159	338	401	1255	123.665	0.59123	86.4253	95.0226	67.4	1.37945
Sao Mateus (ES)	Sao Mateus	ES	Southeast	109028	14706	0.735	0.719	0.843	0.655	37.35	29.48	Aw	64.56	23.67	107.46	-18.7189	-39.8589	43	1734	1648	2131	381	5937	5445.39	8	55	41	55	31	190	174.267	0.298433	46.1538	92.3077
Sao Paulo (SP)	Sao Paulo	SP	Southeast	11253503	48275.4	0.805	0.843	0.855	0.725	64	57.25	Cfb	777.81	18.43	141.45	-23.5509	-46.6379	1329	16321	59398	78176	20159	175383	1558.47	983	6436	5491	14914	8748	36572	324.983	0.474956	95.9276	100	89	0.598001
Sao Pedro da Aldeia (RJ)	Sao Pedro da Aldeia	RJ	Southeast	87875	15588.8	0.712	0.721	0.801	0.626	44.08	33.73	Aw	21.63	22.31	82.52	-22.8431	-42.1038	69	1934	315	52	812	3182	3621.05	2	59	7	18	30	116	132.006	0.588517	23.9819	65.6109	67.9	1.44783
Sao Sebastiao (SP)	Sao Sebastiao	SP	Southeast	73942	71810.1	0.772	0.747	0.875	0.703	50.46	42.77	Cfa	303.63	20.79	174.64	-23.8053	-45.4144	455	3713	5343	7367	56	16934	22901.7	3	61	61	94	24	243	328.636	0.693528	42.9864	90.4977	70.6	1.6949
Sao Vicente (SP)	Sao Vicente	SP	Southeast	332445	12516.9	0.768	0.738	0.857	0.716	56.23	49.31	Af	202.61	21.36	235.74	-23.9614	-46.3974	143	5075	1288	3257	811	10574	3180.68	15	308	93	251	75	742	223.195	0.84989	63.8009	95.9276	81.5	1.15332
Sapucaia do Sul (RS)	Sapucaia do Sul	RS	South	130957	19186.9	0.726	0.726	0.844	0.624	50.18	36.32	Cfa	54.09	18.7	139.74	-29.8295	-51.1448	0	24	8	22	4	58	44.2893	4	37	23	17	11	92	70.2521	0.211453	25.7919	20.362
Saquarema (RJ)	Saquarema	RJ	Southeast	74234	21975.5	0.709	0.714	0.804	0.621	36.41	28.02	Aw	56.67	22.13	93.33	-22.9317	-42.4907	81	2839	242	2038	2334	7534	10149	2	67	13	28	28	138	185.899	0.715294	30.3167	95.4751
Serra (ES)	Serra	ES	Southeast	409267	33039	0.739	0.72	0.844	0.664	51.55	42.57	Am	44.52	23.2	108.94	-20.1188	-40.3089	837	10025	5024	4403	4414	24703	6035.91	23	203	152	279	259	916	223.815	0.476241	79.638	99.095	61.1	1.25869
Sertaozinho (SP)	Sertaozinho	SP	Southeast	110074	37289.8	0.761	0.768	0.855	0.672	54.05	42.59	Cwa	561	21.2155	123.58	-21.1492	-47.9928	34	871	379	1533	3008	5825	5291.89	2	51	20	22	61	156	141.723	0.576314	30.7692	82.8054
Sete Lagoas (MG)	Sete Lagoas	MG	Southeast	214152	35787.4	0.76	0.742	0.84	0.705	47.73	35.91	Cwa	794.94	20.04	118	-19.4572	-44.2433	152	21733	635	1956	11442	35918	16772.2	7	437	21	81	76	622	290.448	0.898582	47.5113	90.4977	78.1	2.86598
Sobral (CE)	Sobral	CE	Northeast	188233	17138.3	0.714	0.647	0.832	0.675			As	165.53	26.44	68.21	-3.69082	-40.3507	25	566	1308	2702	700	5301	2816.19	3	47	18	13	11	92	48.8756	0.0234757	20.8145	95.4751
Sorocaba (SP)	Sorocaba	SP	Southeast	586625	42764.7	0.798	0.792	0.843	0.762	63.35	54.2	Cfa	624.7	19.52	107.97	-23.5033	-47.4565	719	16764	6496	66879	385	91243	15553.9	67	479	118	1346	249	2259	385.084	0.923141	86.4253	95.0226	74.5	2.12311
Sousa (PB)	Sousa	PB	Northeast	65803	11870.9	0.668	0.645	0.814	0.567	21.79	17.93	As	265.07	25.3	73.84	-6.75204	-38.2318	2	687	194	568	1775	3226	4902.51	0	11	40	96	39	186	282.662	0.08081	15.3846	60.6335	70.2	1.20921
Sumare (SP)	Sumare	SP	Southeast	241311	43810.6	0.762	0.744	0.845	0.705	57.22	45.36	Cfa	600.56	19.97	107.68	-22.8223	-47.2743	146	4094	5995	20964	473	31672	13125	5	85	79	157	24	350	145.041	0.655755	44.3439	95.0226	80.1	1.58435
Suzano (SP)	Suzano	SP	Southeast	262480	32193.2	0.765	0.708	0.873	0.723	48.51	37.16	Cfb	791.47	18.31	150.44	-23.5445	-46.318	15	122	235	1185	462	2019	769.201	13	36	45	92	42	228	86.8638	0.644656	42.9864	80.9955	81.3	0.791161
Taboao da Serra (SP)	Taboao da Serra	SP	Southeast	244528	27899.5	0.769	0.742	0.863	0.71	58.32	49.99	Cfb	779.77	18.47	124.73	-23.6221	-46.7827	14	267	1670	4028	368	6347	2595.61	2	13	51	142	40	248	101.42	0.747403	35.2941	89.5928	86.7	0.927942
Taquaritinga (SP)	Taquaritinga	SP	Southeast	53988	18337.2	0.748	0.727	0.827	0.696	48.12	38.67	Cwa	558.56	21.15	113.6	-21.4064	-48.5056	24	1092	320	769	1580	3785	7010.82	2	41	4	14	8	69	127.806	0.413647	14.9321	77.3756
Tatui (SP)	Tatui	SP	Southeast	107326	29292.2	0.752	0.734	0.842	0.688	50.09	39.06	Cfa	599.47	19.79	101.28	-23.3488	-47.8482	20	171	165	1318	128	1802	1679	7	33	11	45	15	111	103.423	0.505942	23.9819	74.6606
Taubate (SP)	Taubate	SP	Southeast	278686	50563.1	0.8	0.778	0.883	0.746	61.48	50.42	Cwa	709.72	18.89	117.43	-23.0209	-45.5576	142	1589	11359	4229	3338	20657	7412.28	21	158	450	263	164	1056	378.921	0.840508	79.1855	97.7376	83	1.03103
Teofilo Otoni (MG)	Teofilo Otoni	MG	Southeast	134745	13717.1	0.701	0.698	0.824	0.598	35.68	27.82	Aw	447.81	22.13	90.79	-17.8602	-41.5098	173	7850	614	744	3894	13275	9851.94	6	121	44	67	40	278	206.316	0.636627	43.8914	96.3801	69.7	2.65896
Teresina (PI)	Teresina	PI	Northeast	814230	17697.6	0.751	0.731	0.82	0.707	37.36	30.37	Aw	113.31	27.14	122.3	-5.0907	-42.8001	470	2773	4522	6111	2989	16865	2071.28	41	211	126	233	217	828	101.691	0.448908	76.4706	99.095	78.3	0.648093
Teresopolis (RJ)	Teresopolis	RJ	Southeast	163746	23446.3	0.73	0.752	0.855	0.605	47.42	38.03	Cfb	1055.44	16.6859	131.295	-22.4175	-42.9751	7	297	29	48	528	909	555.128	19	46	19	44	92	220	134.354	0.425105	41.629	47.5113	78	0.6021
Timoteo (MG)	Timoteo	MG	Southeast	81243	28461.3	0.77	0.737	0.836	0.742	57.89	48.03	Aw	359.49	22.11	118.05	-19.5817	-42.6481	803	6034	62	107	1552	8558	10533.8	45	227	25	34	94	425	523.122	0.820602	47.0588	66.0633	78.6	1.60159
Tres Coraçoes (MG)	Tres Coraçoes	MG	Southeast	72765	23013.3	0.744	0.73	0.855	0.66	46.65	39	Cwb	912.13	18.48	128.16	-21.6924	-45.253	3	56	1042	1423	671	3195	4390.85	0	7	32	22	18	79	108.569	0.542702	18.0995	51.5837
Tres Lagoas (MS)	Tres Lagoas	MS	Midwest	101791	59241.8	0.744	0.752	0.849	0.645	46.9	35.26	Aw	377.091	22.8916	121.349	-20.7885	-51.7064	132	6833	496	2255	965	10681	10493.1	4	42	23	47	32	148	145.396	0.393964	36.6516	98.19
Tres Rios (RJ)	Tres Rios	RJ	Southeast	77432	36661.9	0.725	0.725	0.801	0.656	51.72	39.12	Cwa	424.86	20.53	126.98	-22.117	-43.2181	12	2325	16	99	413	2865	3700.02	3	114	15	19	46	197	254.417	0.809324	28.0543	37.1041	74.5	0.896423
Uba (MG)	Uba	MG	Southeast	101519	21342.1	0.724	0.727	0.841	0.62	45.17	39.46	Cwa	484.12	20.7	114.7	-21.1199	-42.9425	25	2625	103	1891	3032	7676	7561.15	0	74	6	65	52	197	194.052	0.694126	28.9593	77.3756	60.6	4.01057
Ubatuba (SP)	Ubatuba	SP	Southeast	78801	17277.1	0.751	0.741	0.841	0.679	44.24	34.2	Cfa	328.83	20.76	186.96	-23.4336	-45.084	75	3386	3250	4845	326	11882	15078.5	2	138	92	187	53	472	598.977	0.755702	56.1086	94.5701	82.7	1.09976
Uberaba (MG)	Uberaba	MG	Southeast	295988	34509.5	0.772	0.772	0.845	0.705	55.49	46.58	Cwa	811.23	20.63	133.43	-19.7477	-47.9398	930	14752	3749	4323	2269	26023	8791.91	22	600	66	115	111	914	308.796	0.906397	62.4434	96.8326	74.4	1.7993
Uberlandia (MG)	Uberlandia	MG	Southeast	604013	39857.8	0.789	0.776	0.885	0.716	57.31	47.61	Cwa	810.38	20.95	127.02	-18.9159	-48.2763	248	8302	6040	19671	9175	43436	7191.24	41	604	256	767	519	2187	362.078	0.620418	93.2127	99.095	91.6	0.519974
Unai (MG)	Unai	MG	Southeast	77565	27467.8	0.736	0.723	0.847	0.651	32.55	22.39	Aw	760.89	22.02	118.57	-16.3608	-46.9032	7	538	2817	5970	890	10222	13178.6	1	17	63	57	17	155	199.832	0.662678	31.2217	88.2353	72.6	1.6542
Uruguaiana (RS)	Uruguaiana	RS	South	125435	16170.7	0.744	0.722	0.863	0.661	43.37	31.38	Cfa	94.953	18.6123	130.648	-29.7661	-57.0859	2	2	1	2	2	2	1.59445	6	24	5	21	23	79	62.9808	0.566375	4.97738	0.904977
Valinhos (SP)	Valinhos	SP	Southeast	106793	42736.8	0.819	0.848	0.85	0.763	70.86	60.24	Cfa	757.51	19	111.82	-22.9703	-46.9995	44	293	523	1923	135	2918	2732.39	5	44	76	163	39	327	306.2	0.589842	46.6063	89.5928	79.8	0.979201
Varginha (MG)	Varginha	MG	Southeast	123081	31103.7	0.778	0.76	0.875	0.707	57.31	46.63	Cwb	925.68	18.52	131.44	-21.5562	-45.4387	15	330	559	2679	2912	6495	5277.01	13	69	24	61	45	212	172.244	0.343216	40.724	92.3077	84.8	0.82097
Vespasiano (MG)	Vespasiano	MG	Southeast	104527	20383.6	0.688	0.677	0.811	0.592	44.07	29.97	Cwa	798.2	19.81	128.88	-19.6892	-43.9266	38	6044	313	565	1570	8530	8160.57	2	50	7	19	33	111	106.193	0.499177	24.8869	86.8778
Viçosa (MG)	Viçosa	MG	Southeast	72220	15604.4	0.775	0.758	0.883	0.696	55.85	47.18	Cwa	720.75	19.49	113.44	-20.7549	-42.879	6	985	39	203	3229	4462	6178.34	2	76	14	16	80	188	260.316	0.61765	33.4842	59.7285	84.1	0.861246
Vila Velha (ES)	Vila Velha	ES	Southeast	414586	21914.2	0.8	0.807	0.864	0.734	63.25	56.8	Am	15.85	23.24	106.32	-20.3478	-40.2998	659	5733	1330	2998	2485	13205	3185.11	51	488	144	372	289	1344	324.179	0.782589	89.5928	99.5475	71.3	1.21508
Vinhedo (SP)	Vinhedo	SP	Southeast	63611	102187	0.817	0.84	0.878	0.739	67.42	56.65	Cfa	731.8	19.1	110.86	-23.031	-46.9846	40	272	496	2640	49	3497	5497.48	1	21	30	76	15	143	224.804	0.500654	31.2217	76.9231	76	1.21422
Vitoria (ES)	Vitoria	ES	Southeast	327801	64001.9	0.845	0.876	0.855	0.805	73.88	68.41	Am	22.09	23.26	108.08	-20.2978	-40.2967	2436	20505	3586	4434	3567	34528	10533.2	31	377	206	457	490	1561	476.204	0.390412	88.6878	100	79.9	0.822639
Vitoria da Conquista (BA)	Vitoria da Conquista	BA	Northeast	306866	14647.2	0.678	0.681	0.788	0.581	38.2	32.45	Cfa	812.61	20.87	65.17	-14.8617	-40.844	70	957	203	600	2587	4417	1439.39	11	95	64	129	128	427	139.149	0.61923	59.7285	87.3303	68.6	1.84137
Vitoria de Santo Antao (PE)	Vitoria de Santo Antao	PE	Northeast	129974	18091.8	0.64	0.629	0.768	0.543	22	18.84	As	252.78	24.42	103.23	-8.12811	-35.2998	21	299	90	1847	1412	3669	2822.87	1	3	4	54	16	78	60.012	0.609578	18.0995	84.6154
Volta Redonda (RJ)	Volta Redonda	RJ	Southeast	257803	39740.1	0.771	0.763	0.833	0.72	61.16	50.05	Cwa	453.85	20.37	118	-22.5075	-44.096	141	14529	513	4163	3709	23055	8942.87	21	568	68	304	204	1165	451.895	0.930043	75.5656	92.7602	83.6	1.53306
Votorantim (SP)	Votorantim	SP	Southeast	108809	21486.7	0.767	0.72	0.838	0.747	58.25	46.64	Cfb	774.33	18.64	107.97	-23.5403	-47.4447	66	1928	795	5196	55	8040	7389.09	7	39	19	147	23	235	215.975	0.786576	38.009	88.2353	71.2	1.60805
Votuporanga (SP)	Votuporanga	SP	Southeast	84692	23909.4	0.79	0.772	0.857	0.744	53.92	44.29	Aw	464.51	22.28	105.56	-20.4166	-49.9819	164	2314	3168	3148	824	9618	11356.4	10	41	39	43	12	145	171.209	0.516051	31.6742	97.2851
																	Total	69033	1222944	569194	1350741	870329	4074652		8895	76639	32902	76171	63963	258570
